# Supplementary material for: Using Social Ecological Model to Assess the Determinants of Health Facility Birth Preparedness Practices among Indigenous Maasai Women in Northern Tanzania
Source: Research Square preprint supplement (doi:10.21203/rs.3.rs-5804626/v1), 2025-04-28
Supplement: Supplementary file 1 [file 94ec90ef6649899704c45b1f.pdf]

## English Version Questionnaire

|                   |  |
|-------------------|--|
| Questionnaire No. |  |
| Household ID No   |  |

Time Interview Started: Hour: \_\_\_\_\_ Minute: \_\_\_\_\_

Time Interview Ended: Hour: \_\_\_\_\_ Minute: \_\_\_\_\_

|                    |  |
|--------------------|--|
| Date               |  |
| Interviewer's name |  |

### At individual level

#### Participant's background characteristics

| S/N | Respondent's identification _____<br>Questionnaire Code _____<br><b>Instruction: Circle to the appropriate answer</b> | Response                                                                                            | Skip |
|-----|-----------------------------------------------------------------------------------------------------------------------|-----------------------------------------------------------------------------------------------------|------|
|     | <b>Socio-Demographic questions</b>                                                                                    |                                                                                                     |      |
| 01  | How old are you?                                                                                                      | Completed age .....                                                                                 |      |
| 02  | What is your educational status?                                                                                      | Informal education .....1<br>Primary level (1-7) .....2<br>Secondary level .....3<br>College .....4 |      |
| 03  | What is your husband's educational status?                                                                            | Informal education .....1<br>Primary level (1-7) .....2<br>Secondary level .....3<br>College .....4 |      |
| 04  | What is your occupation?                                                                                              | Employed---1<br>Self-employed.....2<br>Unemployed-----3                                             |      |
| 05  | What is your husband's occupation?                                                                                    | Employed---1<br>Self-employed.....2<br>Unemployed-----3,                                            |      |
| 06  | What is your marital status?                                                                                          | Single--1, Married----2. Divorced---3, Separated---4. Widowed-----5,                                |      |
| 07  | Are you currently living with your partner?                                                                           | Yes .....1<br>No.....2                                                                              |      |
| 08  | Does your husband have other wives?                                                                                   | Yes....1, No.....2                                                                                  |      |

|                                                  |                                                                           |                                                                                                                         |  |
|--------------------------------------------------|---------------------------------------------------------------------------|-------------------------------------------------------------------------------------------------------------------------|--|
| 09                                               | If YES, how many wives does your husband have?                            | The number of wives.....                                                                                                |  |
| 10                                               | What is the total number of your family members?                          | Total number.....                                                                                                       |  |
| 11                                               | How much money do you earn per month on average?                          | Tsh.....                                                                                                                |  |
| 12                                               | How many meals does your family usually have per day?                     | One meal-----1 Two meals-----2, Three meals-----3                                                                       |  |
| 13                                               | What is the main source of drinking water for the members of your family? | Public tap/standpipe.....1<br>Well, / .....2<br>Rainwater.....3<br>River.....4                                          |  |
| 14                                               | How long does it take to go there and get water?                          | Minutes-----1,<br>Hours-----2                                                                                           |  |
| 15                                               | What is the main material of the floor?                                   | Earth/ sand-----1, Dang-----2,<br>Tiles -----3, cement-----4,<br>Carpet-----5                                           |  |
| 16                                               | What is the main material of the roof?                                    | Grass/ mud-----1,<br>Iron sheets-----2                                                                                  |  |
| 17                                               | What is the main material of the exterior walls?                          | Palms/Trunks/Bamboo-----1<br>Mud-----2, Stones -----3,<br>Sun-dried bricks----4, Backed bricks—5<br>Cement blocks-----6 |  |
| 18                                               | Which type of transport does your family possess?                         | A bicycle-----1,<br>A motorcycle-----2<br>A car-----3<br>Others (specify)-----4                                         |  |
| 19                                               | Where do you currently access media?                                      | None ....1, Television.....2 ,<br>Radio .....3<br>Newspaper - hard copy.....4                                           |  |
| 20                                               | What kind of toilet facility do members of your family usually use?       | Flush toilet.....1,<br>Pit latrine .....2<br>No Facility/Bush/Field ..... 3                                             |  |
| 21                                               | What is the main source of energy you mainly use?                         | Electricity..... 1<br>Lpg/Natural Gas..... 2<br>Biogas.....3, Kerosene..... 4<br>Charcoal.....6<br>Firewood.....7       |  |
| <b>Past obstetric characteristics</b>            |                                                                           |                                                                                                                         |  |
| <b>Health services received during pregnancy</b> |                                                                           |                                                                                                                         |  |
| 01                                               | Parity                                                                    | Number of children .....                                                                                                |  |
| 02                                               | Did you receive ANC care during your pregnancy period?                    | Yes -----1<br>No-----2                                                                                                  |  |

|                                          |                                                                                      |                                                                                                                                                                                                                                                                     |  |
|------------------------------------------|--------------------------------------------------------------------------------------|---------------------------------------------------------------------------------------------------------------------------------------------------------------------------------------------------------------------------------------------------------------------|--|
| 03                                       | If yes, how many ANC contacts did you have during your pregnancy?                    | Number of contacts .....1                                                                                                                                                                                                                                           |  |
| 04                                       | What was the gestational age at first contact?                                       | In weeks ..... 1                                                                                                                                                                                                                                                    |  |
| 05                                       | Why did you not receive any ANC services? (CIRCLE ALL RESPONSES GIVEN.)              | I did not know where to go.....1<br>Health facility too far.....2<br>Too expensive .....3<br>No one was there to accompany....4<br>Services are not good.....5                                                                                                      |  |
| <b>Services received during delivery</b> |                                                                                      |                                                                                                                                                                                                                                                                     |  |
| 01                                       | Where did you give birth to your last child?                                         | Health facility.....1<br>Home.....2<br>TBA's home ..... 3                                                                                                                                                                                                           |  |
| 02                                       | Did you plan to give birth at this place?                                            | Yes..... 1<br>No ..... 2                                                                                                                                                                                                                                            |  |
| 03                                       | If delivered at a health facility, how did you get there?                            | Ambulance..... 1<br>Private car..... 2<br>Taxi/bus..... 3<br>Motorbike..... 4<br>On foot..... 5<br>Bicycle..... 6                                                                                                                                                   |  |
| 04                                       | How long did it take to reach the health facility?                                   | Less than 30 minutes.....1<br>30 minutes.....2<br>1 hour.....3<br>1 hour to 2 hours.....4<br>More than 2 hours.....5                                                                                                                                                |  |
| 05                                       | Who made the final decision about where you would give birth?                        | Respondent..... 1<br>Respondent and husband ..... 2<br>Husband..... 3<br>Relatives .....4<br>TBA.....5                                                                                                                                                              |  |
| 06                                       | Can you tell the reasons why you did not give birth in a health facility?            | I didn't think it necessary..... 1<br>The husband/family didn't think it necessary ....2<br>The facility is too far..... 3.<br>The roads are rough and poor.....4<br>No transport.... 5.<br>Too expensive ... 6.<br>Services are poor. ....7<br>No time to go.... 8 |  |
| <b>Health Services After Delivery</b>    |                                                                                      |                                                                                                                                                                                                                                                                     |  |
| 01                                       | Did you have subsequent visits during postnatal period? (7,28,42 days)               | Yes .....1<br>No.....2                                                                                                                                                                                                                                              |  |
| 02                                       | If yes, how many times did you have postnatal Contacts during the postpartum period? | Once.....1<br>Twice.....2<br>More than twice...3                                                                                                                                                                                                                    |  |

| <b>Practices of birth preparedness</b>                            |                                                                                                                         |                                                                                                                                                                                                                                                                |  |
|-------------------------------------------------------------------|-------------------------------------------------------------------------------------------------------------------------|----------------------------------------------------------------------------------------------------------------------------------------------------------------------------------------------------------------------------------------------------------------|--|
|                                                                   | Which preparation did you make during pregnancy for safe delivery?                                                      | Identify transport..... 1<br>Save money ..... 2<br>Identify blood donor..... 3<br>Identified health facility for delivery ....4<br>Identified a companion to the facility....5<br>Prepared materials for delivery like clothes for herself and the baby....6   |  |
| <b>Knowledge of obstetric danger during the continuum of care</b> |                                                                                                                         |                                                                                                                                                                                                                                                                |  |
|                                                                   | Question                                                                                                                | Codes                                                                                                                                                                                                                                                          |  |
| 01                                                                | What are some serious health problems that can occur during pregnancy that could endanger the life of a pregnant woman? | Vaginal bleeding.....1<br>Severe headache.....2<br>Blurred vision.....3<br>Convulsion.....4<br>Reduced fetal movement.....5<br>Severe lower abdominal pain.....6                                                                                               |  |
| 02                                                                | Danger signs that can occur during labor and delivery that could endanger the life of a pregnant woman?                 | Severe vaginal bleeding.....1<br>Severe headache.....2<br>Blurred vision.....3<br>Convulsion.....4<br>Prolonged labor (lasting > 12hours) .....4<br>Retained placenta (placenta not delivered more than 30 minutes delivery of the baby) ....6                 |  |
| 03                                                                | What are some danger signs that can occur 42 days post-delivery that can endanger the life of the woman?                | Severe bleeding.....1<br>Severe headache.....2<br>Blurred vision .....3<br>Convulsions.....4<br>High fever.....5<br>Malodorous Vaginal Discharge (Heavy, foul-smelling discharge and pain in the stomach) .....6                                               |  |
| <b>Knowledge of the BP items</b>                                  |                                                                                                                         |                                                                                                                                                                                                                                                                |  |
|                                                                   | What are the things a woman should prepare for birth?                                                                   | Identify the mode of transport.....1<br>Save Money .....2<br>Identify Blood Donor.....3<br>Identify health facility for delivery.....4<br>Identify a companion to a health facility ...5<br>Materials for delivery including babies and mothers' clothes ----6 |  |

| Attitudes towards BP |                                                                                                                                 |                                                                                                                                                                              |        |         |        |         |  |
|----------------------|---------------------------------------------------------------------------------------------------------------------------------|------------------------------------------------------------------------------------------------------------------------------------------------------------------------------|--------|---------|--------|---------|--|
|                      | Question                                                                                                                        | Codes                                                                                                                                                                        |        |         |        |         |  |
| 01                   | A woman should plan ahead for the place where she will give birth to her baby.                                                  | SD<br>1                                                                                                                                                                      | D<br>2 | UD<br>3 | A<br>4 | SA<br>5 |  |
| 02                   | A woman should plan ahead of time how she will get to the place where she will give birth                                       | SD<br>1                                                                                                                                                                      | D<br>2 | UD<br>3 | A<br>4 | SA<br>5 |  |
| 03                   | A husband or partner doesn't need to accompany his wife to antenatal care visits.                                               | SD<br>1                                                                                                                                                                      | D<br>2 | UD<br>3 | A<br>4 | SA<br>5 |  |
| 04                   | When women do not go to a health facility to give birth, it is mainly because it is too expensive.                              | SD<br>1                                                                                                                                                                      | D<br>2 | UD<br>3 | A<br>4 | SA5     |  |
| 05                   | When women do not go to a health facility to give birth, it is mainly because it is too difficult to get there.                 | SD<br>1                                                                                                                                                                      | D<br>2 | UD<br>3 | A<br>4 | SA<br>5 |  |
| 06                   | When women do not go to a health facility to give birth, it is mainly because the staff there do not treat them respectfully    | SD<br>1                                                                                                                                                                      | D<br>2 | UD<br>3 | A<br>4 | SA<br>5 |  |
| 07                   | Giving birth is mostly a woman's business. Husbands and family have little to contribute.                                       | SD<br>1                                                                                                                                                                      | D<br>2 | UD<br>3 | A<br>4 | SA<br>5 |  |
|                      | <b>Interpersonal level</b>                                                                                                      |                                                                                                                                                                              |        |         |        |         |  |
| 01                   | Did you discuss with your family or another person about where you should give birth?<br><br>If yes, with whom did you discuss? | YES, NO<br>Where to give birth 1.....2<br><br>husband .....1<br>Mother-in-law.....2<br>Other family members.....3<br>Friend/neighbor .....4<br>Community health worker.....5 |        |         |        |         |  |
| 02                   | Did you discuss with your family or another person about transport arrangements?<br>If yes, with whom did you discuss?          | YES....1 NO.....2<br>Transportation .1.....2<br>Husband .....1<br>Mother-In-Law.....2<br>Other Family members.....3<br>Friend/Neighbor.....4<br>Community Health Worker 5    |        |         |        |         |  |
| 03                   | During the period of pregnancy, did your husband accompany you for ANC services?                                                | Yes.....1<br>No.....2                                                                                                                                                        |        |         |        |         |  |

|                        |                                                                                                                                                                                                                                                                                            |                                                                                                                       |  |
|------------------------|--------------------------------------------------------------------------------------------------------------------------------------------------------------------------------------------------------------------------------------------------------------------------------------------|-----------------------------------------------------------------------------------------------------------------------|--|
| 04                     | If yes, how many times did he accompany you to the ANC?                                                                                                                                                                                                                                    | Number of times.....1                                                                                                 |  |
| <b>Community level</b> |                                                                                                                                                                                                                                                                                            |                                                                                                                       |  |
| 01                     | Where do you think it is safe to give birth?                                                                                                                                                                                                                                               | Health facility.....1<br>At home.....2<br>TBA's home.....3<br>Anywhere .....4                                         |  |
| 02                     | In your community, how would a woman go to a health facility?                                                                                                                                                                                                                              | Ambulance .....1<br>Private Car....2. Taxi/Bus ...3<br>Motorbike .....4<br>On Foot.....5<br>Bicycle .....6.           |  |
| 03                     | In general, how long would it take to reach this health facility?                                                                                                                                                                                                                          | Less than 30 minutes.....1<br>30 minutes.....2<br>1 hour.....3<br>1 hour to 2 hours.....4<br>More than 2 hours.....5  |  |
| 04                     | Are the medicines and medical supplies available at these health facilities throughout?                                                                                                                                                                                                    | Yes.....1<br>No.....2<br>Sometimes.....3                                                                              |  |
| 05                     | How are the services at this facility? Would you rate them as excellent, good, average, or poor?                                                                                                                                                                                           | Excellent ....1. Good .....2<br>Average ....3. Poor.....4<br>Very poor.....5                                          |  |
| 06                     | Does your community provide services to assist women in preparing for birth? For instance, are there transportation services for women?<br>Ways to get money to help families pay for birth?<br>Ways to get blood donated during pregnancy or complications<br>Education programs for PBCR | YES, NO,<br><br>Transport.....1..... 2<br><br>Financial... .1..... 2<br><br>Blood.....1.....2<br>Education ...1.....2 |  |
| <b>Societal level</b>  |                                                                                                                                                                                                                                                                                            |                                                                                                                       |  |
| 1                      | Are the infrastructure such as roads passable throughout the year to access maternal health care services                                                                                                                                                                                  | Yes .....1<br>No.....2                                                                                                |  |
| 2                      | Are maternal health services provided for free in all public health facilities?                                                                                                                                                                                                            | Yes.....1<br>No.....2                                                                                                 |  |
| 3                      | Is a referral system available?                                                                                                                                                                                                                                                            | Yes.....1, No.....2                                                                                                   |  |
| 4                      | In case of emergency, is the referral system well-known to community members?                                                                                                                                                                                                              | Yes.....1<br>No.....2                                                                                                 |  |

|   |                                                           |                        |  |
|---|-----------------------------------------------------------|------------------------|--|
| 5 | Is transportation readily available in case of emergency? | Yes.....1<br>No.....2. |  |
|---|-----------------------------------------------------------|------------------------|--|

Thank you for your time and consideration.
